# Supplementary material for: Prussian blue analogue nanoenzymes mitigate oxidative stress and boost bio-fermentation
Source: Royal Society of Chemistry journal article supplement (doi:10.1039/c9nr04951g), 2019-01-01
Supplement: c9nr04951g1.pdf [file c9nr04951g1.pdf]

## Supporting Information

### Prussian Blue Analogue Nanoenzymes Mitigate Oxidative Stress and Boost Bio-Fermentation

Renwu Zhou,<sup>#,\*,a,b,c</sup> Peiyu Wang,<sup>#,a,b</sup> Yanru Guo,<sup>#,d</sup> Xiaofeng Dai,<sup>e</sup> Shaoqing Xiao,<sup>f</sup> Zhi Fang,<sup>\*,g</sup> Robert Speight,<sup>a</sup> Erik W. Thompson,<sup>a,b</sup> Patrick J. Cullen<sup>c</sup> and Kostya (Ken) Ostrikov<sup>a,b</sup>

<sup>a</sup> Institute of Health and Biomedical Innovation, School of Chemistry, Physics and Mechanical Engineering, Science and Engineering Faculty, Queensland University of Technology, Brisbane QLD 4000, Australia.

<sup>b</sup> Translational Research Institute, Brisbane, QLD 4000, Australia

<sup>c</sup> School of Chemical and Biomolecular Engineering, The University of Sydney, NSW 2006, Australia

<sup>d</sup> Beijing National Laboratory for Molecular Sciences (BNLMS), College of Chemistry and Molecular Engineering, Peking University, Beijing 100871, China

<sup>e</sup> Wuxi School of Medicine, Jiangnan University, 214122, China

<sup>f</sup> Engineering Research Center of IoT Technology Applications (Ministry of CEducation), Department of Electronic Engineering, Jiangnan University, Wuxi, 214122 China

<sup>g</sup> College of Electrical Engineering and Control Science, Nanjing Tech University, Nanjing 210009, China.

<sup>#</sup> Renwu Zhou, Peiyu Wang and Yanru Guo contributed equally to this work.

\*Corresponding author

Email: zhoubenwu2015@163.com

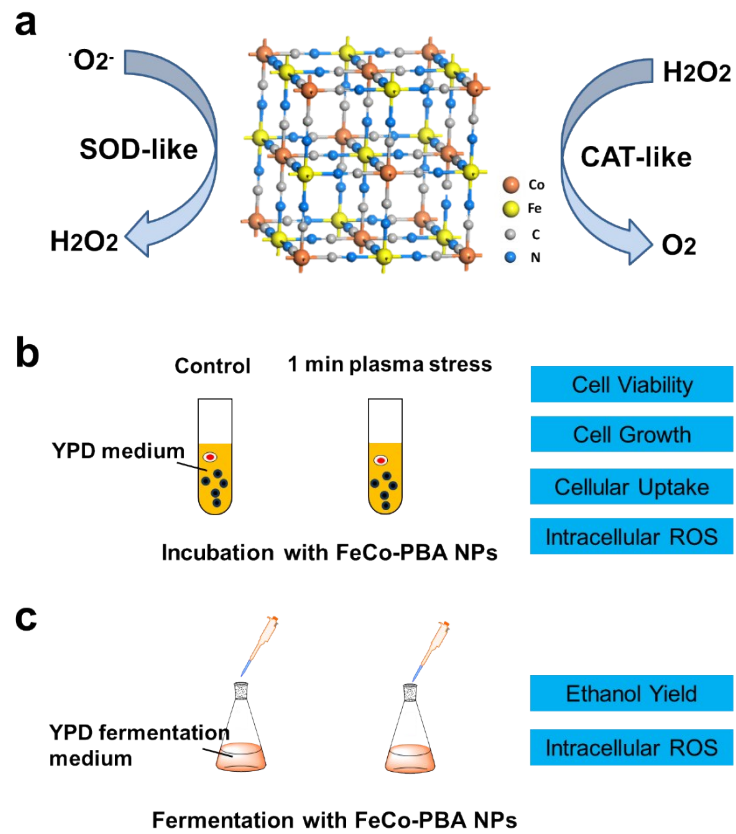

**Fig. S1** (a) Schematic illustration of FeCo-PBA NPs with SOD- and CAT-like activities. (b) and (c) Schematic representation of the experimental procedure on the biological ability of FeCo-PBA NPs, as well as FeCo-PBA NPs applied for yeast fermentation.

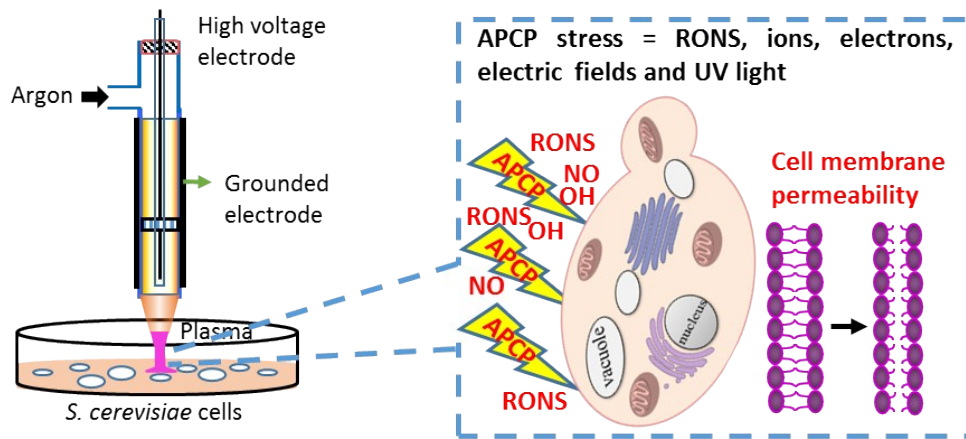

**Fig. S2** Schematic illustration of APCP stress, including reactive oxygen and nitrogen species (RONS), ions, electrons, electric field and UV light, which may induce some oxidative stress to *S. cerevisiae* cells.

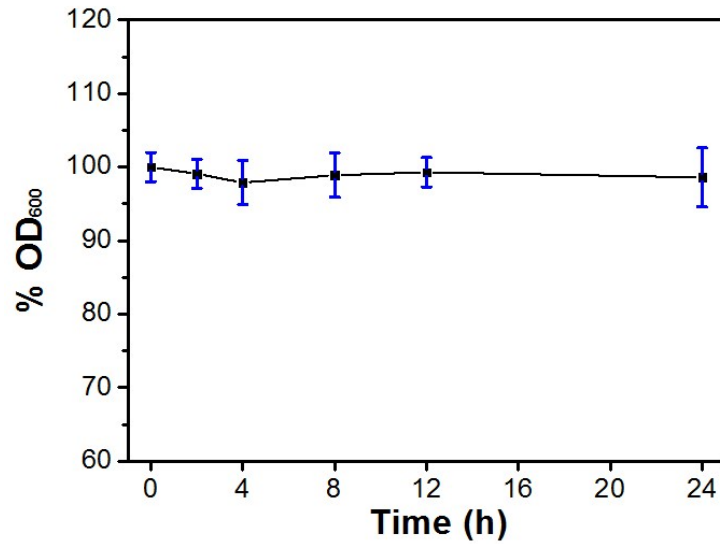

**Fig. S3** UV-vis measurement of PBA-NPs at a concentration of 100 µg/mL in media.

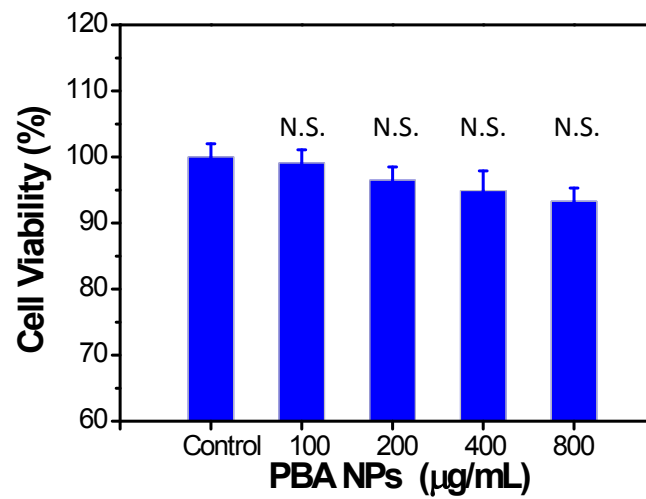

**Fig. S4** Cell viability of *S. cerevisiae* under different concentrations of PBA NPs ranging from 0-800 µg/mL.

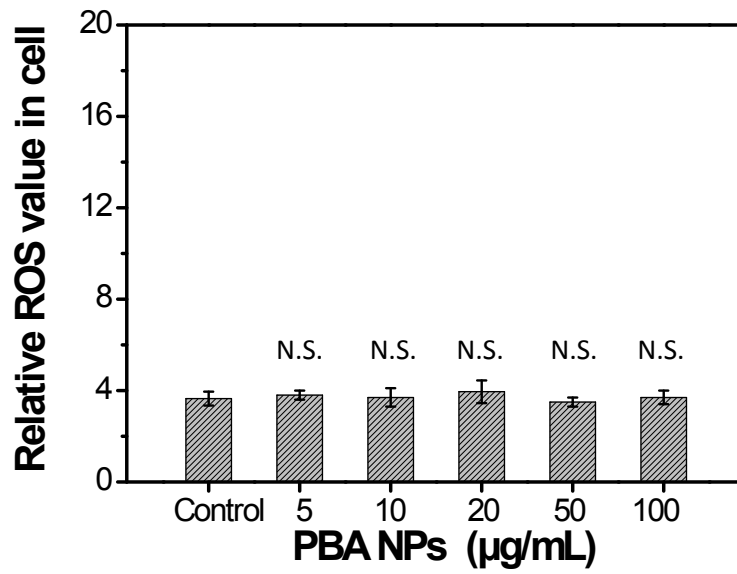

Fig. S5 Intracellular ROS level in *S. cerevisiae* under different concentrations of PBA NPs.

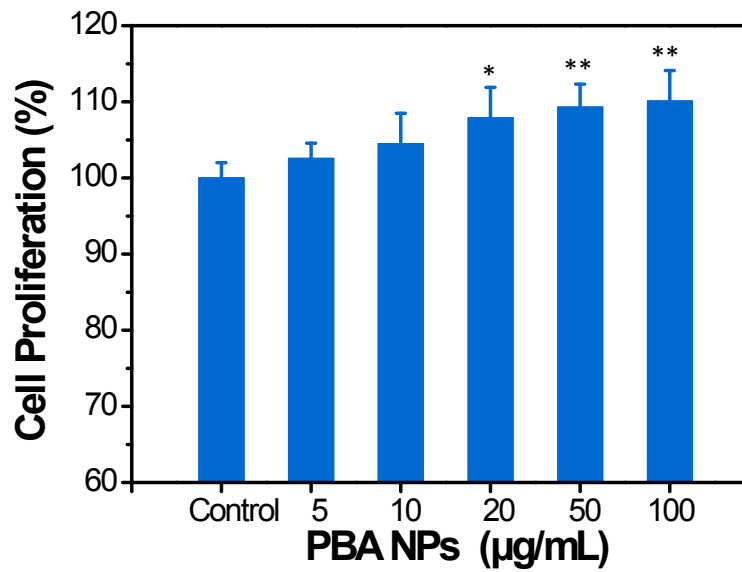

Fig. S6 Cell growth of *S. cerevisiae* under different concentrations of PBA NPs.

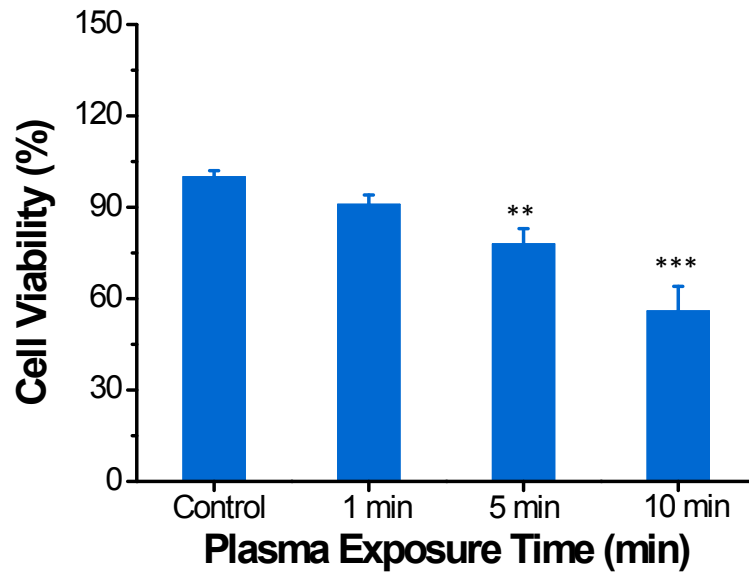

**Fig. S7** Effect of APCP exposure on the cell viability of *S. cerevisiae* as a function of plasma exposure time.

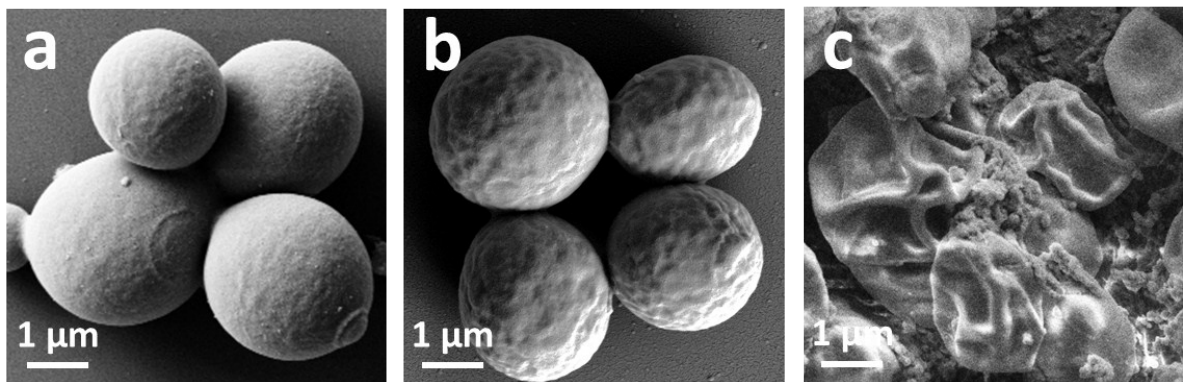

**Fig. S8** Representative SEM images of yeast cells showing untreated (a) and 1-minute (b) and 10-min (c) plasma-treated yeast cells.

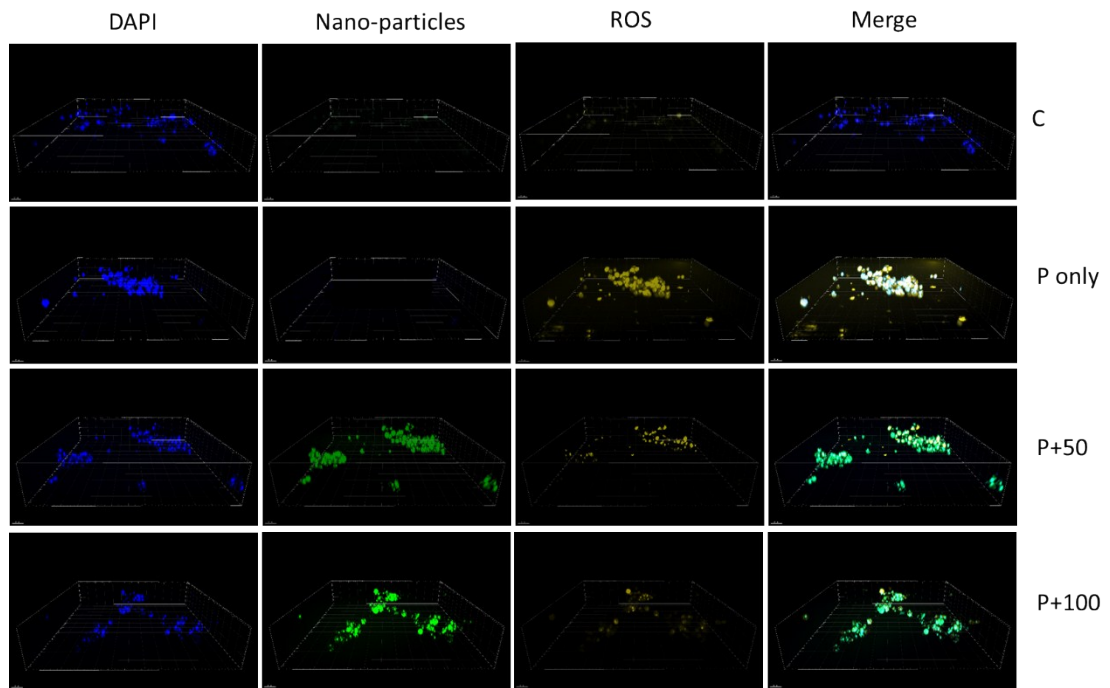

**Fig. S9** Confocal microscopy 3D images of PBA NPs uptaken by *S. cerevisiae* cells. After different types of treatments, these cells are stained by DAPI (blue) and CellROX (yellow) and fixed at room temperature. The z-stacking is scanned by Spinning Disc Confocal Microscope Nikon.
